# Supplementary material for: Characteristics of the Follicular Fluid Extracellular Vesicle Molecular Profile in Women in Different Age Groups in ART Programs
Source: MDPI journal article supplement (doi:10.3390/life14050541), 2024-04-24
Supplement: s1 [file s1]

Table S1. Antibodies which were used for western blotting for EVs characterization.

| Name          | Catalog number | Organism          | Application                                                                                    | Manufacturer                | Concentrations |
|---------------|----------------|-------------------|------------------------------------------------------------------------------------------------|-----------------------------|----------------|
| CD81 Antibody | DF8045         | Human             | Western blot; enzyme immunoassay                                                               | Affinity Biosciences, China | 1:1000         |
| CD63 Antibody | AF5117         | Human, Mouse, Rat | Western blot; immunohistochemistry, enzyme immunoassay                                         | Affinity Biosciences, China | 1:1000         |
| CD9 Antibody  | AF5139         | Human, Mouse, Rat | Western blot; immunohistochemistry, immunofluorescence/immunocytochemistry, enzyme immunoassay | Affinity Biosciences, China | 1:1000         |
