# Supplementary material for: Characteristics of the Follicular Fluid Extracellular Vesicle Molecular Profile in Women in Different Age Groups in ART Programs
Source: Life (Basel). 2024 Apr 24;14(5):541. doi: 10.3390/life14050541 (PMC11121889; doi:10.3390/life14050541)
Supplement: Supplementary file 1 [file life-14-00541-s001.zip › life-2920509-supplementary Table S2.xlsx]

## Sheet: Lipid ID
#	m/z	Retention Time, min	Lipid
1	642.628	17.4866	CE(16:0)
2	640.612	17.1815	CE(16:1)
3	670.651	17.488	CE(18:0)
4	664.613	16.9466	CE(18:3)
5	692.641	17.1589	CE(20:3)
6	690.63	17.0521	CE(20:4)
7	688.615	16.7765	CE(20:5)
8	664.652	15.5181	Cer-NS(d20:1/23:0)
9	646.607	14.8125	Cer-NS(d18:1/24:2)
10	369.359	17.2068	Cholesterol-H2O
11	496.348	4.34573	LPC(16:0)
12	518.331	4.35136	LPC(16:0)
13	494.334	3.51186	LPC(16:1)
14	524.38	5.69163	LPC(18:0)
15	522.363	4.61168	LPC(18:1)
16	520.349	3.84513	LPC(18:2)
17	546.366	4.21068	LPC(20:3)
18	544.349	3.7579	LPC(20:4)
19	438.205	2.18313	OxLPC(11:1(CHO))
20	542.331	3.84511	OxLPC(16:1(OOO))
21	522.259	3.52593	OxLPC(16:2(COOH))
22	758.583	12.6982	PC(16:0_18:2)
23	782.583	12.417	PC(16:0_20:4)
24	760.598	13.6613	PC(16:0_18:1)
25	806.582	12.0797	PC(16:0_22:6)
26	784.597	12.9246	PC(16:0_20:3)
27	808.598	12.5942	PC(16:0_22:5)
28	780.565	12.6898	PC(16:1_20:4)
29	780.567	11.7006	PC(16:1_20:4)
30	786.614	13.9	PC(18:0_18:2)
31	810.616	13.518	PC(18:0_20:4)
32	812.628	14.0899	PC(18:0_20:3)
33	808.596	12.8599	PC(18:0_20:5)
34	783.588	12.396	PEtOH(20:1_20:1)-H
35	783.588	8.19978	PEtOH(20:1_20:1)-H
36	614.583	14.4048	plasmanyl-TG(O-18:0_8:0_8:0)
37	766.594	13.1567	Plasmenyl-PC(P-16:0/20:4)
38	877.738	16.6542	SM(d22:5/25:0)
39	684.617	16.3884	TG(10:0_14:0_14:0)
40	792.721	16.2731	TG(13:0_16:1_17:1)
41	824.784	17.0338	TG(14:0_16:0_18:0)
42	796.752	16.7653	TG(14:0_16:0_16:0)
43	820.752	16.5896	TG(14:0_16:1_18:1)
44	794.736	16.5136	TG(14:0_16:0_16:1)
45	782.735	16.5923	TG(14:0_15:0_16:0)
46	768.719	16.4489	TG(14:0_14:0_16:0)
47	766.706	16.1733	TG(14:0_14:1_16:0)
48	818.736	16.3365	TG(14:0_16:1_18:2)
49	920.879	17.6581	TG(14:1_16:0_25:0)
50	810.768	16.8877	TG(15:0_16:0_16:0)
51	808.752	16.6528	TG(15:0_16:0_16:1)
52	936.91	18.0548	TG(15:0_16:0_25:0)
53	922.895	17.9112	TG(15:0_16:0_24:0)
54	948.91	17.9506	TG(15:0_16:1_26:0)
55	806.737	16.4306	TG(15:1_16:0_16:1)
56	874.8	16.8835	TG(16:0_18:1_18:2)
57	822.769	16.8089	TG(16:0_16:0_16:1)
58	848.784	16.8596	TG(16:0_16:1_18:1)
59	850.8	17.0704	TG(16:0_16:1_18:0)
60	852.815	17.2898	TG(16:0_16:0_18:0)
61	878.83	17.3193	TG(16:0_18:0_18:1)
62	846.768	16.6429	TG(16:0_16:1_18:2)
63	880.847	17.5373	TG(16:0_18:0_18:0)
64	908.878	17.7805	TG(16:0_18:0_20:0)
65	876.815	17.0929	TG(16:1_18:0_18:1)
66	872.785	16.6584	TG(16:1_18:1_18:2)
67	906.866	17.5499	TG(16:1_18:0_20:0)
68	934.896	17.8423	TG(16:1_20:0_20:0)
69	870.769	16.4194	TG(16:1_18:1_18:3)
70	904.846	17.3376	TG(18:0_18:1_18:1)
71	898.8	16.6865	TG(18:1_18:2_18:2)
72	900.816	16.9158	TG(18:1_18:1_18:2)
73	896.785	16.4362	TG(18:1_18:2_18:3)
74	669.453	15.0233	PA(34:4)
75	345.216	10.7776	AcCa(10DC)
76	342.252	18.0196	AcCa(12:1)
77	342.254	19.2555	AcCa(12:1)
78	372.325	20.6167	AcCa(14:0)
79	626.583	18.3401	CE(15:1)
80	626.582	17.7834	CE(15:1)
81	652.599	14.582	CE(17:2)
82	668.645	17.4894	CE(18:1)
83	666.631	17.2181	CE(18:2)
84	714.631	16.913	CE(22:6)
85	714.613	16.3238	CE(22:6)
86	452.403	5.81253	Cer(d10:0_18:2)
87	512.513	11.667	Cer(d10:0_22:0)
88	438.387	4.70875	Cer(d10:0_17:2)
89	540.544	12.829	Cer(d10:0_24:0)
90	480.437	13.6078	Cer(d10:0_20:2)
91	480.435	7.35749	Cer(d10:0_20:2)
92	400.386	6.94543	Cer(d10:0_14:0)
93	470.455	13.813	Cer(d10:0_19:0)
94	508.466	8.84392	Cer(d10:0_22:2)
95	526.517	15.0795	Cer(d10:0_23:0)
96	554.55	15.5532	Cer(d10:0_25:0)
97	484.471	14.1573	Cer(d10:0_20:0)
98	510.487	14.6819	Cer(d10:0_22:1)
99	386.385	17.2265	Cer(d10:0_13:0)
100	480.437	17.3052	Cer(d10:0_20:2)
101	532.449	12.9036	Cer(d12:0_22:4)
102	548.514	14.0083	Cer(d13:0_22:3)
103	550.517	15.3298	Cer(d13:0_22:2)
104	516.435	10.8351	Cer(d13:0_20:5)
105	580.565	15.9201	Cer(d13:0_24:1)
106	492.45	12.1865	Cer(d13:0_18:3)
107	522.488	14.7226	Cer(d13:0_20:2)
108	544.467	11.8297	Cer(d13:0_22:5)
109	546.486	14.7029	Cer(d13:0_22:4)
110	556.452	4.44705	Cer(d14:0_22:6)
111	608.595	16.2886	Cer(d14:1_25:0)
112	624.62	14.8436	Cer(d14:0_26:0)
113	622.605	14.5904	Cer(d14:1_26:0)
114	594.58	16.124	Cer(d14:0_24:1)
115	622.611	16.373	Cer(d14:1_26:0)
116	594.572	13.8298	Cer(d14:0_24:1)
117	560.5	15.2229	Cer(d14:0_22:4)
118	592.557	13.7935	Cer(d14:1_24:1)
119	570.467	4.60322	Cer(d15:0_22:6)
120	606.581	16.2338	Cer(d15:1_24:1)
121	578.549	15.8653	Cer(d15:0_22:2)
122	636.62	14.9727	Cer(d15:1_26:0)
123	638.622	14.5665	Cer(d15:0_26:0)
124	574.518	15.5182	Cer(d15:0_22:4)
125	568.489	7.10286	Cer(d15:1_22:6)
126	606.574	14.1292	Cer(d15:1_24:1)
127	584.485	5.52723	Cer(d16:0_22:6)
128	620.597	16.3997	Cer(d16:1_24:1)
129	650.637	15.2468	Cer(d16:1_26:0)
130	590.549	16.0072	Cer(d16:0_22:3)
131	650.636	17.166	Cer(d16:1_26:0)
132	604.565	16.027	Cer(d17:0_22:3)
133	596.52	8.54721	Cer(d17:1_22:6)
134	662.637	15.3114	Cer(d17:2_26:0)
135	594.468	5.90383	Cer(d17:2_22:6)
136	666.657	15.4465	Cer(d17:0_26:0)
137	632.59	14.35	Cer(d17:2_24:1)
138	632.596	16.2985	Cer(d17:2_24:1)
139	632.596	16.6191	Cer(d17:2_24:1)
140	634.606	14.7733	Cer(d17:1_24:1)
141	424.37	4.60888	Cer(d18:2_8:0)
142	676.655	15.5954	Cer(d18:2_26:0)
143	678.668	15.7753	Cer(d18:1_26:0)
144	680.684	15.8245	Cer(d18:0_26:0)
145	612.516	6.95526	Cer(d18:0_22:6)
146	674.643	16.7724	Cer(d18:3_26:0)
147	616.565	16.0537	Cer(d18:0_22:4)
148	660.629	16.6894	Cer(d18:3_25:0)
149	644.598	16.3589	Cer(d18:3_24:1)
150	616.545	15.0458	Cer(d18:0_22:4)
151	618.575	13.9901	Cer(d18:0_22:3)
152	660.622	14.9966	Cer(d18:3_25:0)
153	672.63	16.6373	Cer(d18:4_26:0)
154	618.581	16.4475	Cer(d18:0_22:3)
155	646.612	16.5107	Cer(d18:2_24:1)
156	660.626	16.9467	Cer(d18:3_25:0)
157	628.566	16.086	Cer(d19:0_22:5)
158	700.639	16.3716	Cer(d20:4_26:0)
159	706.7	16.0593	Cer(d20:1_26:0)
160	704.684	16.013	Cer(d20:2_26:0)
161	688.655	15.5364	Cer(d20:3_25:0)
162	690.669	15.7725	Cer(d20:2_25:0)
163	686.643	16.7948	Cer(d20:4_25:0)
164	640.547	8.36016	Cer(d20:0_22:6)
165	708.716	16.1099	Cer(d20:0_26:0)
166	692.685	15.6882	Cer(d20:1_25:0)
167	690.67	0.862833	Cer(d20:2_25:0)
168	686.637	15.3621	Cer(d20:4_25:0)
169	656.592	14.8309	Cer(d20:5_23:0)
170	722.732	16.3561	Cer(d21:0_26:0)
171	658.521	4.45122	Cer(d22:5_22:6)
172	720.716	16.2772	Cer(d22:1_25:0)
173	716.684	16.1451	Cer(d22:3_25:0)
174	732.716	16.3898	Cer(d22:2_26:0)
175	730.7	16.1507	Cer(d22:3_26:0)
176	718.7	16.1394	Cer(d22:2_25:0)
177	736.748	16.5009	Cer(d22:0_26:0)
178	728.683	15.975	Cer(d22:4_26:0)
179	694.622	16.4516	Cer(d22:6_24:1)
180	734.733	16.4531	Cer(d22:1_26:0)
181	714.669	15.7051	Cer(d22:4_25:0)
182	748.746	16.6093	Cer(d24:1_25:0)
183	764.781	16.6317	Cer(d24:0_26:0)
184	778.796	17.0226	Cer(d25:0_26:0)
185	728.602	8.11959	CerG1(d18:1_18:0)
186	1004.81	0.868428	CerG2(d18:1_26:0)
187	948.735	7.61189	CerG2(d18:1_22:0)
188	564.439	10.8084	CerP(d14:0_16:0)
189	672.537	5.4442	CerP(d14:1_24:1)
190	672.536	15.84	CerP(d14:1_24:1)
191	680.493	13.1482	CerP(d15:1_24:4)
192	682.523	5.87159	CerP(d15:0_24:4)
193	690.557	0.858619	CerP(d15:0_24:0)
194	644.505	4.29928	CerP(d18:1_18:1)
195	736.555	13.1567	CerP(d19:1_24:4)
196	744.597	6.68123	Co(Q8)
197	512.425	4.49636	DG(10:0_17:2)
198	540.456	5.60724	DG(12:0_17:2)
199	542.49	17.346	DG(12:0_17:1)
200	570.522	17.6779	DG(13:0_18:1)
201	620.542	14.4202	DG(13:0_22:4)
202	632.539	10.7986	DG(14:0_22:5)
203	634.549	5.98542	DG(14:0_22:4)
204	628.513	5.39917	DG(14:1_22:6)
205	650.581	14.1742	DG(15:0_22:3)
206	656.541	6.9104	DG(16:1_22:6)
207	740.689	16.0958	DG(17:0_26:0)
208	684.574	8.23912	DG(18:1_22:6)
209	700.61	15.3185	DG(19:0_22:6)
210	780.721	16.3449	DG(20:1_26:0)
211	778.705	16.0719	DG(20:2_26:0)
212	804.721	16.1648	DG(22:3_26:0)
213	734.581	13.709	DG(22:4_22:6)
214	732.558	3.97031	DG(22:5_22:6)
215	800.73	15.2989	DG(22:5_26:0)
216	838.8	17.1477	DG(24:0_26:0)
217	836.784	16.9368	DG(24:1_26:0)
218	866.83	17.3813	DG(26:0_26:0)
219	486.428	16.7667	DG(8:0_17:1)
220	526.441	4.58494	DG(8:0_20:2)
221	584.536	17.7509	DG(8:0_24:1)
222	554.491	17.4093	DG(8:0_22:2)
223	468.316	3.22385	LPC(14:0)
224	546.363	5.70996	LPC(20:3)
225	568.349	3.61874	LPC(22:6)
226	348.327	6.25387	MG(16:0)
227	348.325	19.4382	MG(16:0)
228	348.324	20.2834	MG(16:0)
229	362.334	2.56981	MG(17:0)
230	360.33	9.05613	MG(17:1)
231	360.33	11.2355	MG(17:1)
232	360.331	10.3213	MG(17:1)
233	360.325	7.46435	MG(17:1)
234	394.308	8.24616	MG(20:5)
235	394.308	6.92866	MG(20:5)
236	394.307	14.2698	MG(20:5)
237	394.307	20.9247	MG(20:5)
238	194.119	11.9497	MG(5:0)
239	194.119	10.5837	MG(5:0)
240	250.182	6.58988	MG(9:0)
241	250.182	6.93557	MG(9:0)
242	772.628	8.02817	MGDG(10:0_26:2)
243	741.477	0.879661	MGDG(10:0_22:6)
244	740.56	9.92499	MGDG(10:0_24:4)
245	816.654	7.91287	MGDG(11:0_26:1)
246	754.573	9.95173	MGDG(11:0_24:4)
247	811.62	13.5812	MGDG(12:0_26:2)
248	768.601	13.2044	MGDG(12:0_24:4)
249	750.571	13.1594	MGDG(13:0_22:6)
250	782.603	11.0388	MGDG(13:0_24:4)
251	814.69	13.338	MGDG(13:0_26:2)
252	844.684	0.879722	MGDG(13:0_26:1)
253	762.572	13.1988	MGDG(14:1_22:6)
254	805.567	12.3833	MGDG(14:1_24:4)
255	858.718	13.1116	MGDG(14:0_26:1)
256	778.602	13.1496	MGDG(15:0_22:6)
257	804.564	12.4747	MGDG(15:1_22:6)
258	857.695	0.878317	MGDG(15:0_26:0)
259	776.586	20.4914	MGDG(15:1_22:6)
260	776.585	20.8769	MGDG(15:1_22:6)
261	776.587	4.04481	MGDG(15:1_22:6)
262	803.557	8.02678	MGDG(16:0_22:6)
263	803.556	14.2487	MGDG(16:0_22:6)
264	792.617	13.1706	MGDG(16:0_22:6)
265	803.553	14.4934	MGDG(16:0_22:6)
266	790.601	4.24167	MGDG(16:1_22:6)
267	803.555	13.4814	MGDG(16:0_22:6)
268	882.706	0.861431	MGDG(16:1_26:2)
269	803.557	21.6545	MGDG(16:0_22:6)
270	835.612	13.2466	MGDG(16:0_24:4)
271	790.603	4.61589	MGDG(16:1_22:6)
272	834.609	13.2143	MGDG(17:0_22:6)
273	832.595	9.30774	MGDG(17:1_22:6)
274	902.743	12.9766	MGDG(17:0_26:0)
275	902.744	16.4053	MGDG(17:0_26:0)
276	806.633	14.9939	MGDG(17:0_22:6)
277	862.662	13.1524	MGDG(17:2_24:4)
278	845.605	9.74781	MGDG(17:2_24:4)
279	859.621	10.2301	MGDG(18:2_24:4)
280	831.591	9.32731	MGDG(18:0_22:6)
281	904.707	7.71457	MGDG(18:4_26:2)
282	876.677	6.41276	MGDG(18:2_24:4)
283	647.471	15.0205	MGDG(2:0_24:0)
284	585.369	10.8393	MGDG(2:0_20:3)
285	656.426	0.874106	MGDG(2:0_24:4)
286	519.335	4.35276	MGDG(2:0_15:1)
287	535.368	11.9827	MGDG(2:0_16:0)
288	566.391	5.39638	MGDG(2:0_17:0)
289	927.687	12.8698	MGDG(20:4_25:0)
290	915.684	10.2201	MGDG(20:4_26:2)
291	907.721	0.862861	MGDG(20:3_25:0)
292	920.733	0.868511	MGDG(20:5_25:0)
293	915.678	13.2382	MGDG(20:4_26:2)
294	905.713	7.76523	MGDG(20:4_25:0)
295	945.745	13.1861	MGDG(22:4_26:1)
296	901.575	0.874067	MGDG(22:4_22:6)
297	945.745	13.4715	MGDG(22:4_26:1)
298	945.747	15.4986	MGDG(22:4_26:1)
299	945.744	20.7446	MGDG(22:4_26:1)
300	642.448	9.26001	MGDG(3:0_24:4)
301	612.399	0.872672	MGDG(3:0_22:5)
302	659.493	6.95249	MGDG(3:0_24:1)
303	689.537	21.6686	MGDG(3:0_26:0)
304	688.532	4.15724	MGDG(4:0_26:2)
305	652.422	21.7951	MGDG(4:0_22:6)
306	624.423	7.00599	MGDG(4:0_22:6)
307	703.552	4.42589	MGDG(4:0_26:0)
308	626.424	9.27268	MGDG(4:0_22:5)
309	670.479	9.94185	MGDG(5:0_24:4)
310	670.479	10.4238	MGDG(5:0_24:4)
311	702.548	4.36968	MGDG(5:0_26:2)
312	651.424	0.860072	MGDG(5:0_22:5)
313	746.574	4.38652	MGDG(6:0_26:1)
314	716.564	5.25712	MGDG(6:0_26:2)
315	698.511	11.0402	MGDG(7:0_24:4)
316	679.43	5.53562	MGDG(7:0_22:5)
317	687.432	15.0261	MGDG(8:0_20:5)
318	680.463	8.33056	MGDG(8:0_22:6)
319	774.624	0.874061	MGDG(8:0_26:1)
320	788.624	6.55756	MGDG(9:0_26:1)
321	771.587	7.52624	MGDG(9:0_26:1)
322	506.234	3.52318	OxLPC(15:3(COOH))
323	608.396	6.95386	OxLPC(22:2(OO))
324	664.469	13.1594	OxPC(12:0_14:0(CHO))
325	702.426	13.1918	OxPC(12:0_16:3(COOH))
326	790.394	1.68238	OxPC(14:1(OOOO)_16:4(COOH))
327	856.578	13.1622	OxPC(16:1_22:4(OOO))
328	882.564	0.872678	OxPC(17:2_22:5(OOOO))
329	934.657	9.29932	OxPC(18:1_24:1(OOOO))
330	786.513	6.13576	OxPC(18:2_16:1(COOH))
331	918.593	20.5547	OxPC(18:2(OOH)_22:2(OOO))
332	918.591	19.1443	OxPC(18:2(OOH)_22:2(OOO))
333	830.54	6.09368	OxPC(20:4_19:4(CHO))
334	920.588	0.855822	OxPC(20:5_22:4(OOOO))
335	732.427	7.64854	OxPC(20:5_12:3(CHO))
336	832.535	0.864275	OxPC(20:4_18:4(COOH))
337	852.417	2.20419	OxPC(20:5(OOOO)_15:4(COOH))
338	698.371	19.8123	OxPC(20:4(Ke)_7:1(COOH))
339	944.742	13.151	OxPC(21:0_24:1(Ke,OH))
340	944.743	15.4493	OxPC(21:0_24:1(Ke,OH))
341	850.59	13.1496	OxPC(21:0_19:5(CHO))
342	828.565	12.0981	OxPC(21:0_16:3(COOH))
343	654.344	5.67899	OxPC(22:6_3:0(COOH))
344	874.567	6.03732	OxPC(22:4_19:4(COOH))
345	982.625	0.854392	OxPC(22:2(OO)_22:6(OOOO))
346	876.562	0.867122	OxPC(22:3_19:4(COOH))
347	1048.66	0.865656	OxPC(22:4(OOOO)_24:1(OOOO))
348	992.762	7.53884	OxPC(22:0_24:1(OOOO))
349	838.394	0.862881	OxPC(22:6(OOOO)_12:3(COOH))
350	758.335	19.1809	OxPC(22:6(OOOO)_6:1(COOH))
351	832.65	6.50557	OxPC(23:0_15:0(CHO))
352	966.723	13.2367	OxPC(25:0_22:5(OO))
353	860.682	7.81025	OxPC(25:0_15:0(CHO))
354	1022.79	13.2269	OxPC(25:0_24:1(Ke,OH))
355	1070.78	13.1664	OxPC(26:0_24:1(OOOO))
356	716.412	7.95363	OxPC(8:0_20:5(OOO))
357	826.387	0.883931	OxPE(14:1(OO)_20:5(OOOO))
358	846.389	21.5617	OxPE(15:1(OOOO)_18:4(OOOO))
359	698.267	14.0308	OxPE(18:4(OOO)_8:1(COOH))
360	700.266	14.0323	OxPE(18:4(OOOO)_7:1(COOH))
361	624.247	13.4575	OxPE(18:4(OOOO)_3:0(COOH))
362	612.193	12.6363	OxPE(18:4(Ke,OH)_3:0(COOH))
363	870.416	0.867078	OxPE(18:4(OOO)_20:5(OOOO))
364	626.245	13.4772	OxPE(18:3(OOOO)_3:0(COOH))
365	796.352	1.68378	OxPE(22:6(OOOO)_12:3(COOH))
366	876.417	0.867094	OxPE(22:6(OOOO)_18:5(COOH))
367	802.362	20.3818	OxPE(22:6(OOO)_12:3(COOH))
368	802.363	18.7351	OxPE(22:6(OOO)_12:3(COOH))
369	610.194	12.632	OxPE(3:0(COOH)_18:5(COOH))
370	536.176	11.7554	OxPE(3:0(COOH)_14:3(COOH))
371	600.479	4.3978	OxTG(14:0_14:0_3:0(CHO))
372	614.496	4.4639	OxTG(14:0_14:0_4:0(CHO))
373	750.615	9.06313	OxTG(14:0_14:0_14:2(CHO))
374	694.551	11.7103	OxTG(14:0_14:0_10:2(CHO))
375	694.549	8.0085	OxTG(14:0_14:0_10:2(CHO))
376	750.613	10.2061	OxTG(14:0_14:0_14:2(CHO))
377	638.494	5.84771	OxTG(14:0_14:1_6:1(CHO))
378	694.55	14.6819	OxTG(14:0_14:0_10:2(CHO))
379	750.614	9.29226	OxTG(14:0_14:0_14:2(CHO))
380	694.55	14.1952	OxTG(14:0_14:0_10:2(CHO))
381	1070.85	0.868472	OxTG(16:0_22:6_24:1(OOOO))
382	980.811	16.927	OxTG(18:0_20:4_20:4(OOH))
383	982.792	0.875469	OxTG(18:0_22:5_18:2(OOH))
384	1094.79	12.618	OxTG(22:5_22:5_22:5(OOO))
385	761.602	13.6529	PA(14:0_26:0)
386	817.657	7.88898	PA(18:0_26:0)
387	565.372	21.7656	PA(8:0_18:0)
388	425.222	4.20086	PA(8:0_8:0)
389	1056.91	17.2096	PC(19:0_36:0)
